# Supplementary material for: Coactivator-independent vitamin D receptor signaling causes severe rickets in mice, that is not prevented by a diet high in calcium, phosphate, and lactose
Source: Bone Res. 2024 Aug 20;12:44. doi: 10.1038/s41413-024-00343-7 (PMC11335873; doi:10.1038/s41413-024-00343-7)
Supplement: Supplementary file 6 — Supplementary table 1 [file 41413_2024_343_MOESM6_ESM.xlsx]

## Sheet: Sheet1
			cortical selection
		tibia length (mm)	distance from ref. point (mm)
Normal diet	Vdr+/+	16.70	2.36 - 2.88
	Vdr-/-	13.80	1.94 - 2.37
	VdrΔAF2	13.07	1.84 - 2.25
Rescue diet	Vdr+/+	17.03	2.40 - 2.93
	Vdr-/-	15.89	2.24 - 2.74
	VdrΔAF2	14.43	2.03 - 2.48
